# Supplementary material
Source: publisher figshare collection journal article supplement (https://springernature.figshare.com/ndownloader/files/27606392)
Supplement: Supplementary file [file 27606392]

# OXIDATIVE PHOSPHORYLATION

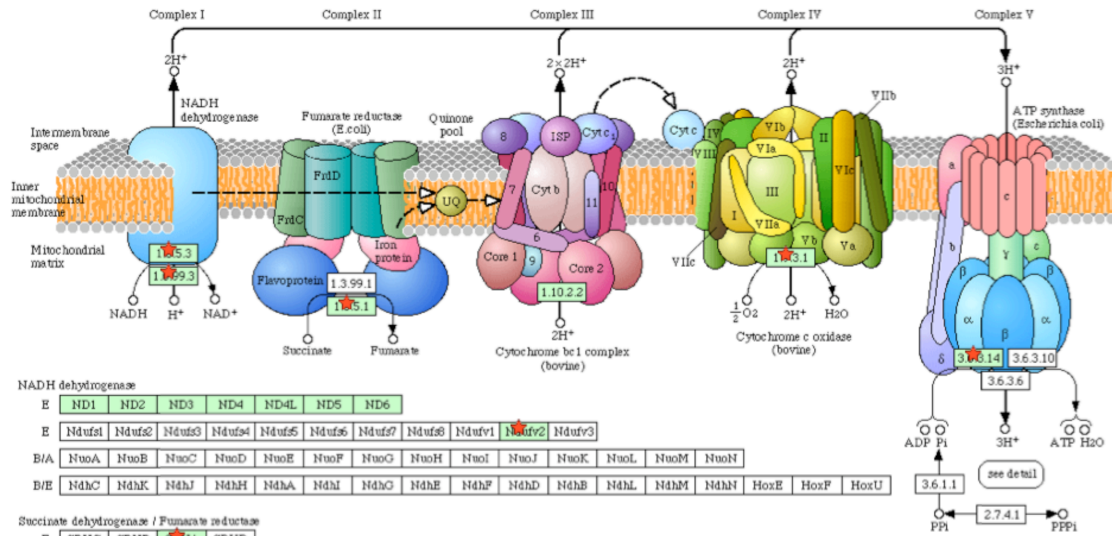

# PROTEASOME

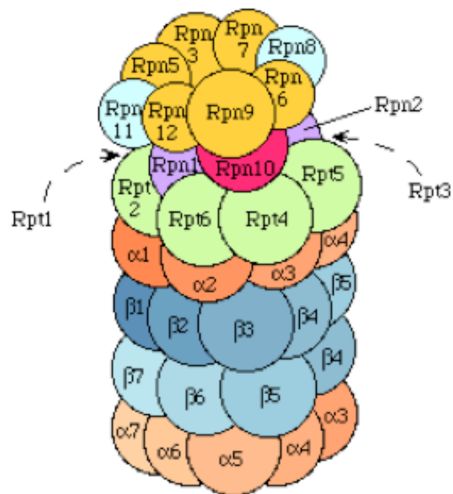

26S Proteasome (*Saccharomyces cerevisiae*)

|      |      |      |       |       |       |    |
|------|------|------|-------|-------|-------|----|
| Rpn1 | Rpn2 | Rpn3 | Rpn4  | Rpn5  | Rpn6  |    |
| Rpn7 | Rpn8 | Rpn9 | Rpn10 | Rpn11 | Rpn12 |    |
| Rpt1 | Rpt2 | Rpt3 | Rpt4  | Rpt5  | Rpt6  |    |
| α1   | α2   | α3   | α4    | α5    | α6    | α7 |
| β1   | β2   | β3   | β4    | β5    | β6    | β7 |
